# Supplementary material for: Exploring targeting peptide-shell interactions in encapsulin nanocompartments
Source: PubMed Central journal article supplement (PMC7925596; doi:10.1038/s41598-021-84329-z), 2021-03-02
Supplement: 41598_2021_84329_MOESM1_ESM.pdf [file 41598_2021_84329_MOESM1_ESM.pdf]

## Supplementary Information

# Exploring targeting peptide-shell interactions in encapsulin nanocompartments

Wiggert J. Altenburg<sup>1,2</sup>, Nathan Rollins<sup>1,2</sup>, Pamela A. Silver<sup>1,2</sup> and Tobias W. Giessen<sup>1,2,3,4\*</sup>

<sup>1</sup> Department of Systems Biology, Harvard Medical School, Boston, MA 02115, USA

<sup>2</sup> Wyss Institute for Biologically Inspired Engineering at Harvard, Boston, MA 02115, USA

<sup>3</sup> Department of Biomedical Engineering, University of Michigan, Ann Arbor, MI 48109, USA

<sup>4</sup> Department of Biological Chemistry, University of Michigan Medical School, Ann Arbor, MI 48109, USA

\* Corresponding author: [tgiessen@umich.edu](mailto:tgiessen@umich.edu)

## Table of Contents

|                                                 |   |
|-------------------------------------------------|---|
| Additional modeling data .....                  | 2 |
| Encapsulin purification .....                   | 4 |
| Additional PAGE gels .....                      | 5 |
| Standard curve for mNeonGreen fluorescence..... | 8 |

## Additional modeling data

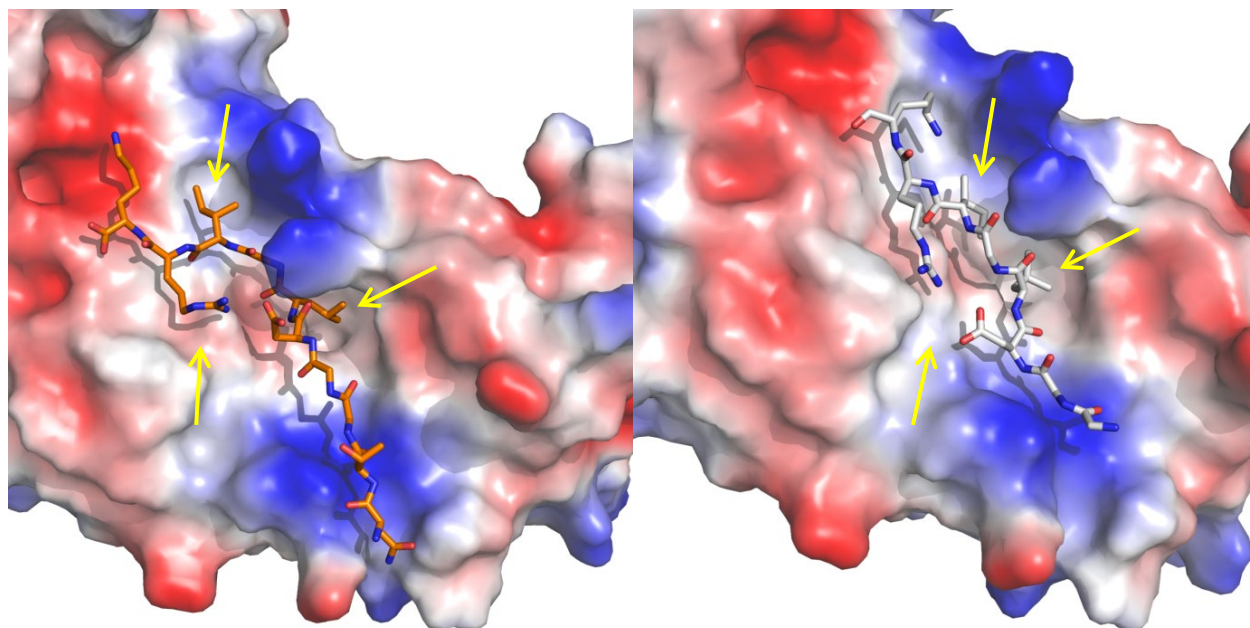

**Figure S1. Comparison of best calculated binding interaction with x-ray structure of the T1 *T. maritima* encapsulin.** Left: Modeled structure. Right: X-ray structure (3DKT). Yellow arrows indicate key interactions. The computed binding mode does recapitulate the intra-peptide interaction between the penultimate arginine and the glutamate residue. PyMOL Molecular Graphics System, Version 1.8.2.0. was used to create the surface representations and atomic structures shown (<http://www.pymol.org>).

**Table S1. Metrics from Rosetta FlexPepDock for all the best scoring models.**

| T1               | minusRama score | Total Score | Rama    | Omega   | Peptide_score | Reweighted Score |
|------------------|-----------------|-------------|---------|---------|---------------|------------------|
| <b>Native</b>    | -392.478        | -351.805    | 49.777  | -9.104  | 1.163         | -376.499         |
| <b>Consensus</b> | -390.189        | -350.946    | 49.720  | -10.477 | 1.076         | -374.954         |
| <b>Control</b>   | -385.955        | -350.310    | 46.990  | -11.345 | -5.238        | -371.539         |
| T3               | minusRama score | Total Score | Rama    | Omega   | Peptide_score | Reweighted Score |
| <b>Native</b>    | 453.953         | 847.084     | 350.944 | 42.187  | -2.876        | 814.846          |
| <b>Consensus</b> | 474.573         | 867.827     | 351.049 | 42.205  | 3.733         | 856.684          |
| <b>Control</b>   | 472.279         | 860.525     | 347.959 | 40.287  | -8.078        | 846.304          |

**Table S2. Raw data of the refinement runs for all point mutations in the native T3 targeting peptide.** This data is the foundation for the heat map shown in Figure 5. Energy contribution per residue is shown. The native sequence is highlighted in green.

|          | 1     | 2       | 3      | 4      | 5      | 6      | 7      | 8      | 9      | 10     | 11     |
|----------|-------|---------|--------|--------|--------|--------|--------|--------|--------|--------|--------|
| <b>A</b> | 9.00  | -5.687  | 0.393  | -8.615 | 8.634  | 2.104  | -0.067 | -2.201 | 3.648  | 4.026  | 2.251  |
| <b>C</b> | 1.03  | -3.067  | -1.510 | -0.667 | -1.732 | 7.448  | -2.501 | 4.176  | 8.195  | 7.967  | 5.197  |
| <b>D</b> | 2.12  | -2.307  | -3.070 | 4.042  | 2.089  | 6.025  | 1.808  | -0.864 | 5.901  | 13.349 | 4.608  |
| <b>E</b> | 4.92  | -6.151  | 5.078  | 5.711  | -1.074 | 3.821  | 1.299  | 11.709 | 7.545  | 0.526  | 10.921 |
| <b>F</b> | 4.70  | -4.372  | -2.383 | -4.634 | 2.303  | 6.912  | 0.838  | 7.945  | 4.464  | 12.993 | 7.549  |
| <b>G</b> | 6.25  | -7.751  | -2.214 | 0.279  | 0.000  | 2.168  | 6.301  | 4.574  | 9.587  | 0.000  | 0.000  |
| <b>H</b> | 2.28  | -1.153  | -1.653 | 3.886  | 1.688  | 7.914  | 3.703  | 0.831  | 2.917  | 7.085  | 5.354  |
| <b>I</b> | -3.07 | -5.181  | -1.324 | 1.449  | 14.795 | 9.626  | -1.544 | -2.580 | 13.152 | 4.411  | 5.753  |
| <b>K</b> | 6.04  | -1.421  | -3.641 | 18.086 | 1.855  | 4.781  | 0.776  | 13.067 | 3.342  | 7.677  | 12.966 |
| <b>L</b> | 9.87  | 0.000   | -4.615 | 3.193  | 2.317  | 4.614  | 0.000  | -2.736 | 2.670  | 0.938  | 12.804 |
| <b>M</b> | 2.95  | 1.248   | -5.732 | 11.514 | 5.453  | 9.013  | 0.665  | 8.821  | 13.152 | 14.061 | 9.778  |
| <b>N</b> | 8.17  | 1.496   | 0.321  | -2.467 | 6.212  | 14.943 | 2.012  | 5.703  | 17.454 | 4.549  | 8.845  |
| <b>P</b> | 0.00  | -0.438  | -6.061 | 6.233  | 1.138  | -2.478 | 1.418  | 2.011  | 9.698  | 4.570  | 6.653  |
| <b>Q</b> | 1.25  | -0.865  | -1.218 | 4.390  | 7.646  | 12.256 | 1.448  | -1.886 | 6.102  | 10.228 | 1.968  |
| <b>R</b> | 3.07  | -6.252  | -0.412 | 7.060  | 6.573  | 11.221 | 5.422  | 0.000  | 0.000  | 12.170 | 8.665  |
| <b>S</b> | 7.77  | -4.507  | -1.528 | -2.801 | 4.094  | 0.000  | 2.947  | -4.878 | 0.717  | 7.585  | 7.652  |
| <b>T</b> | 0.77  | -10.787 | 0.000  | 1.307  | -0.535 | 8.625  | 1.123  | 2.271  | 1.943  | 7.520  | 9.431  |
| <b>V</b> | -0.37 | -7.070  | -2.549 | 0.000  | 1.566  | -0.509 | -0.349 | -3.682 | 10.030 | 11.862 | 11.276 |
| <b>W</b> | 8.76  | 2.547   | -2.870 | 3.513  | 9.463  | 3.904  | 1.276  | 1.716  | 5.007  | 7.415  | 2.353  |
| <b>Y</b> | 7.00  | 4.163   | -6.568 | -0.270 | 8.564  | 12.077 | -0.067 | 4.952  | 0.423  | 7.613  | 8.251  |

# Encapsulin purification

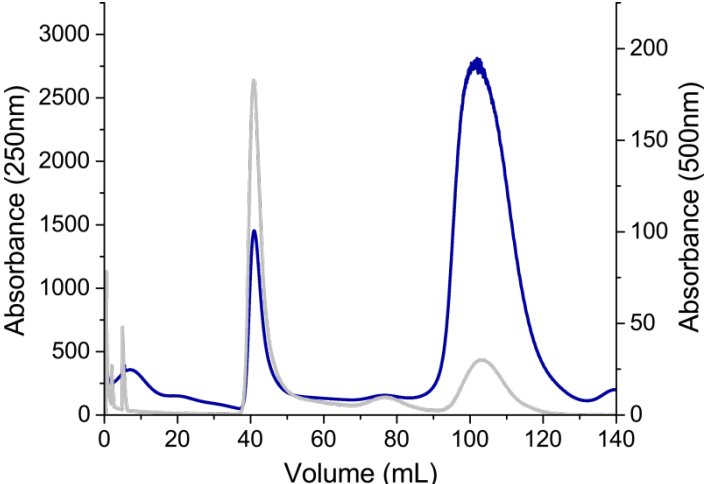

**Figure S2. First encapsulin purification step.** Sample chromatogram of a T1 sample + mNeonGreenTP (native) purification using a HiPrep 16/60 Sephacryl S-500 HR size exclusion column. Blue: Absorption at 280 nm. Gray: Absorption at 500 nm.

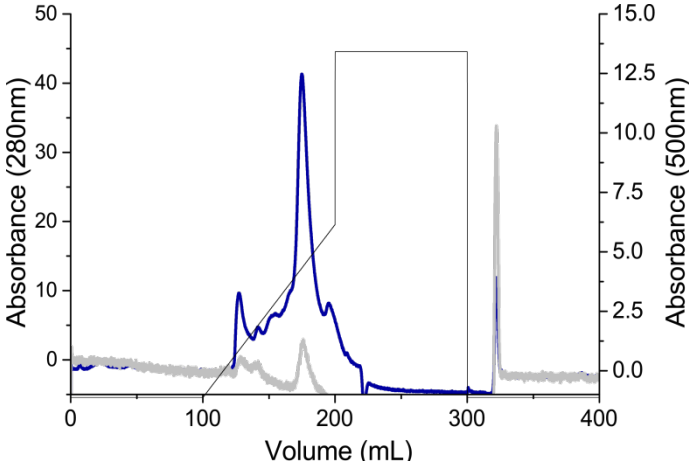

**Figure S3. Second encapsulin purification step.** Sample chromatogram of a T1 sample + mNeonGreenTP (native) purification using a HiPrep DEAE FF 16/10 Ion Exchange column. Blue: Absorption at 280 nm. Gray: Absorption at 500 nm.

## Additional PAGE gels

T1:

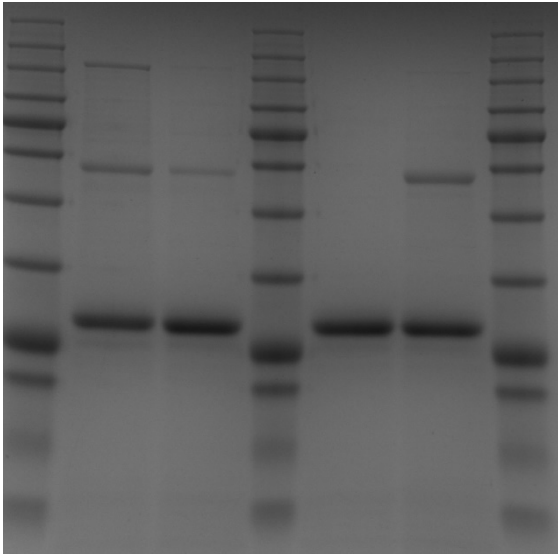

**Figure S4. Sample SDS-PAGE gel of purified T1 encapsulins.** Left to right: MW Marker, T1 Enc no cargo, native TP, MW Marker, consensus TP, control TP. Full gel image of the lanes shown in Figure 3 top row. As outlined in the main text, cargo and the T1 capsid protein could not be separated on the gel but were confirmed via in-gel tryptic digest followed by mass spectrometry analysis of the resulting peptide fragments.

T3:

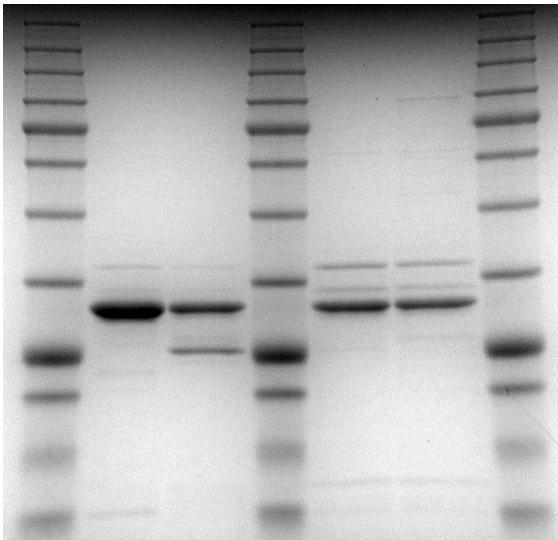

**Figure S5. Sample SDS-PAGE gel of purified T3 encapsulins.** Left to right: MW Marker, T3 Enc no cargo, native TP, MW Marker, consensus TP, control TP. Full gel image of the lanes shown in Figure 3 bottom row.

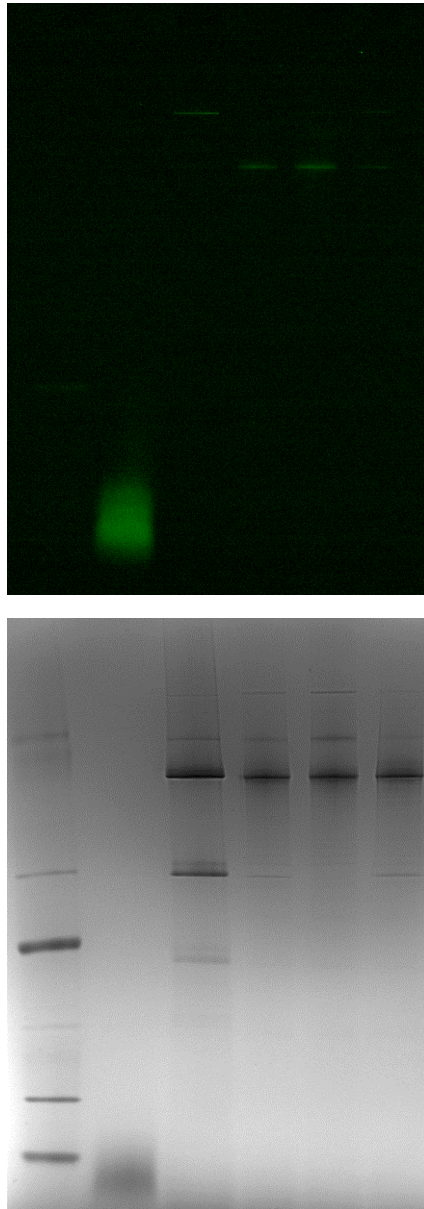

**Figure S6. Sample Native PAGE gel for T1 encapsulins.** Top: Fluorescence image of the gel at 500 nm, Bottom: Coomassie stained gel. Samples Left to right: Ladder (NativeMark Unstained Protein Standard, Life Technologies), mNeonGreen, no cargo, consensus TP, native TP, control TP.

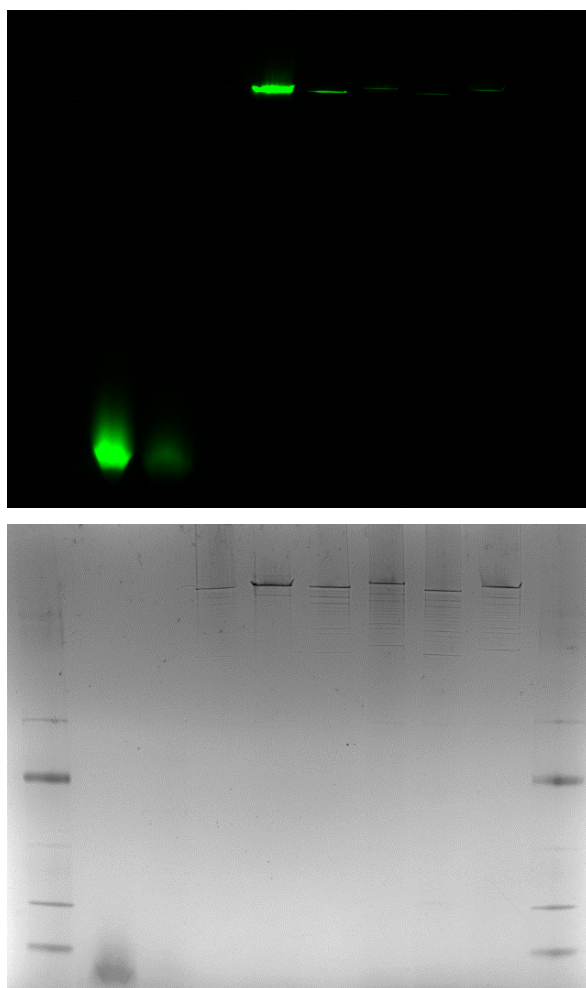

**Figure S7. Sample Native PAGE gel for T3 encapsulins.** Fluorescence image of the gel at 500 nm, Bottom: Coomassie stained gel. Samples Left to right: Ladder (NativeMark Unstained Protein Standard, Life Technologies), mNeonGreen, 1:2 dilution of mNeonGreen, no cargo, native TP, consensus TP, 1:2 dilution of consensus TP, 1:3 dilution of consensus TP, control TP, ladder.

## Standard curve for mNeonGreen fluorescence

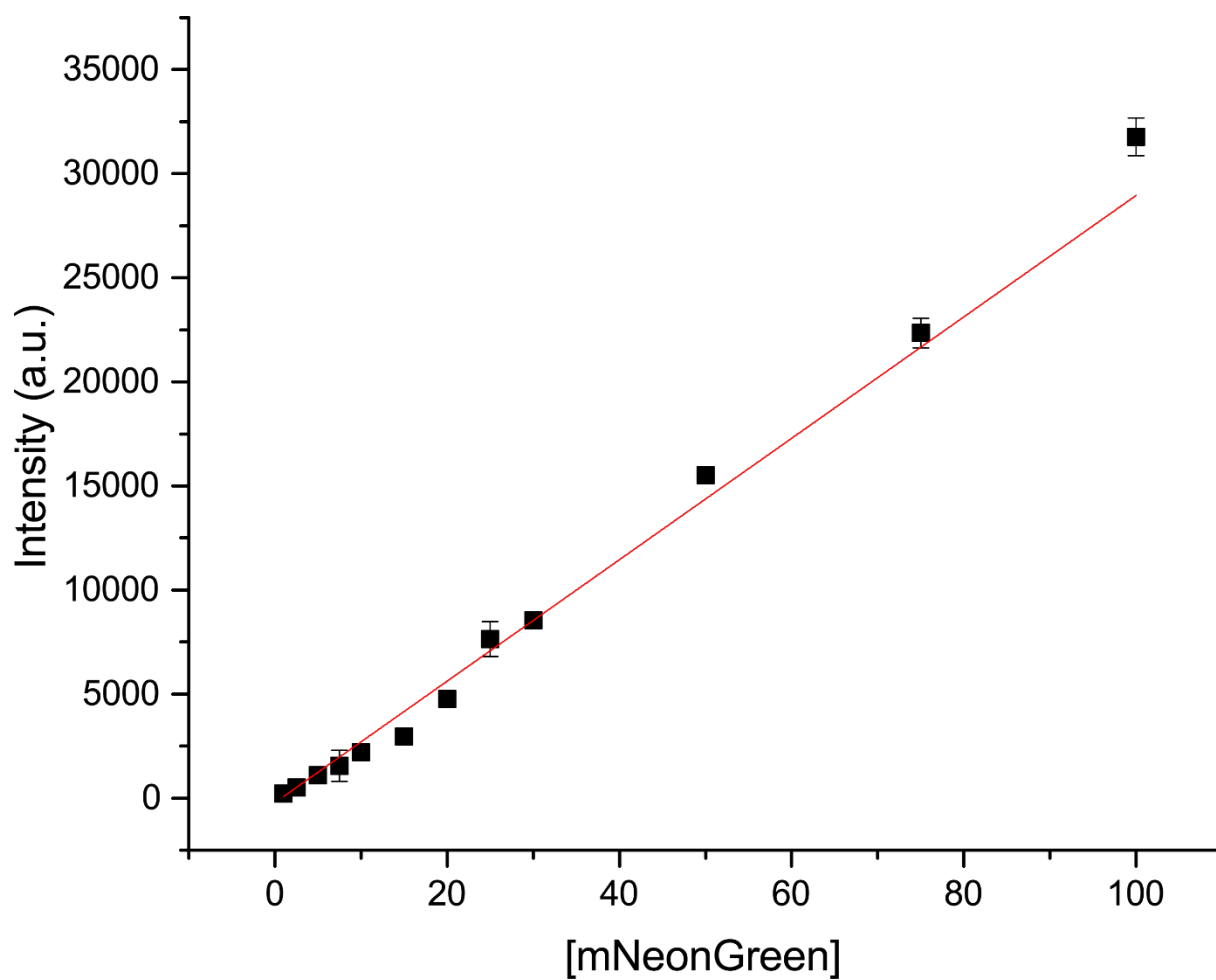

**Figure S8. mNeonGreen fluorescence standard curve.** Measured intensity vs mNeonGreen concentration in nM.  
Fit:  $x = (y+215.1)/291.7$ .
